# Supplementary material for: Impact Assessment of Free-Roaming Dog Population Management by CNVR in Greater Bangkok
Source: Preprints.org preprint supplement (doi:10.20944/preprints202303.0076.v1), 2023-03-03
Supplement: Supplementary file 2 [file supplementary]

Archive with 3 entries (3 files):
- Attitude survey - English.pdf
- SDF SOPs for CNVR.pdf
- Supplementary materials - Street survey protocol.pdf
